# Supplementary material for: Cobalt(ii)-8-hydroxyquinoline-5-sulfonic acid complex/N-(4-aminobutyl)-N-ethylisoluminol/reduced graphene hybrids as nanocatalytic reaction platforms for chemiluminescence
Source: Royal Society of Chemistry journal article supplement (doi:10.1039/c7ra06327j), 2017-01-01
Supplement: c7ra06327j1.pdf [file c7ra06327j1.pdf]

## Supporting Information

# Cobalt(II)-8-hydroxyquinoline-5-sulfonic acid complex/N-(4-aminobutyl)-N- ethylisoluminol/reduced graphene hybrids as nanocatalytic reaction platforms for chemiluminescence

*Qi Li<sup>‡</sup>, Xiangyang Liu<sup>‡</sup>, Meng Zhuang, Xu Wang and Hua Cui\**

CAS Key Laboratory of Soft Matter Chemistry, Collaborative Innovation Center of Chemistry  
for Energy Materials, Department of Chemistry, University of Science and Technology of China,  
Hefei, Anhui 230026, P.R. China

\* Email: hcui@ustc.edu.cn; Tel: +8655163600730; Fax: +8655163600730.

<sup>‡</sup>These authors contributed equally.

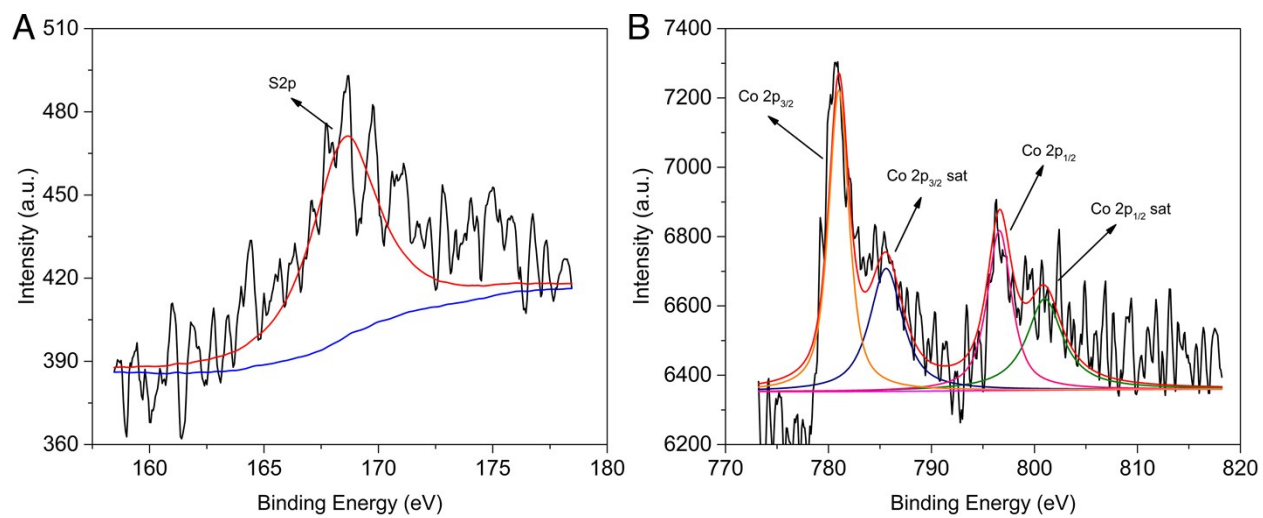

**Figure S1.** XPS survey of A) S 2p and B) Co 2p from Co<sup>II</sup>(HQS)<sub>2</sub>/ABEI/rGO.

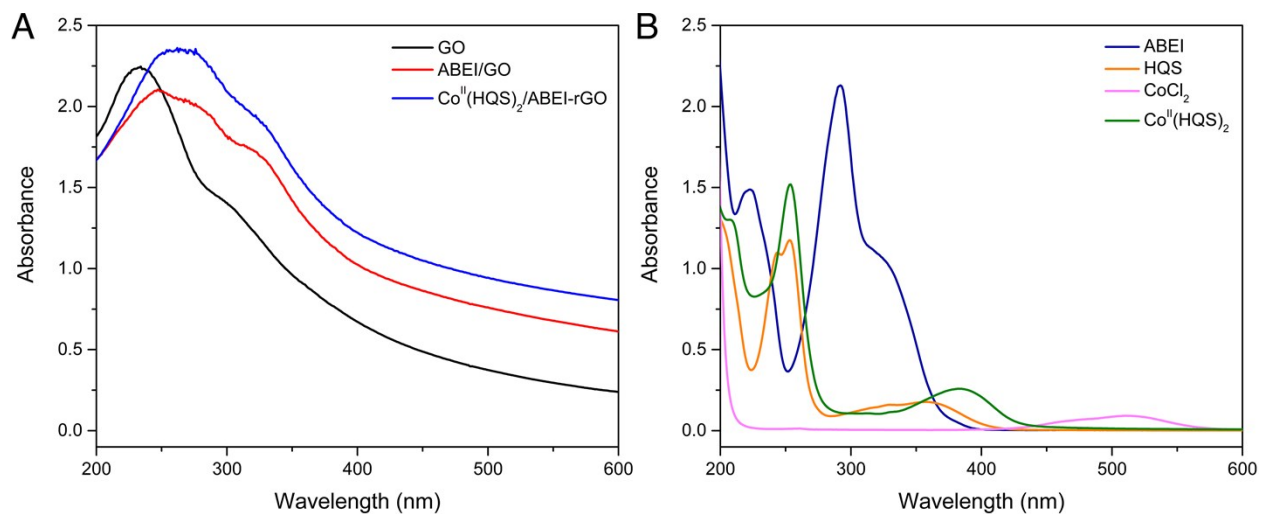

**Figure S2.** UV-vis absorption spectra of A) GO, ABEI/GO and Co<sup>II</sup>(HQS)<sub>2</sub>/ABEI/rGO, B) ABEI, HQS, CoCl<sub>2</sub> and Co<sup>II</sup>(HQS)<sub>2</sub>.

As shown in Figure S2, GO dispersion displayed a maximum absorption at 230 nm, which was due to the  $\pi$ - $\pi^*$  transition of aromatic C=C bonds, and a shoulder at around 300 nm corresponding to the  $n$ - $\pi^*$  transition of the C=O bonds.<sup>1</sup> The absorption peak of the Co<sup>II</sup>(HQS)<sub>2</sub>/ABEI/rGO dispersion at 230 nm gradually redshifted to 255 nm, suggesting that the electronic conjugation within the graphene platelets was restored upon hydrazine reduction, which was agreement with the Raman spectrum. Pure ABEI exhibited characteristic peaks around at 290 nm and 320 nm. Comparing to GO, ABEI/GO and Co<sup>II</sup>(HQS)<sub>2</sub>/ABEI/rGO showed an obviously increment of the shoulder absorption at around 300 nm, which indicated the existence of ABEI.

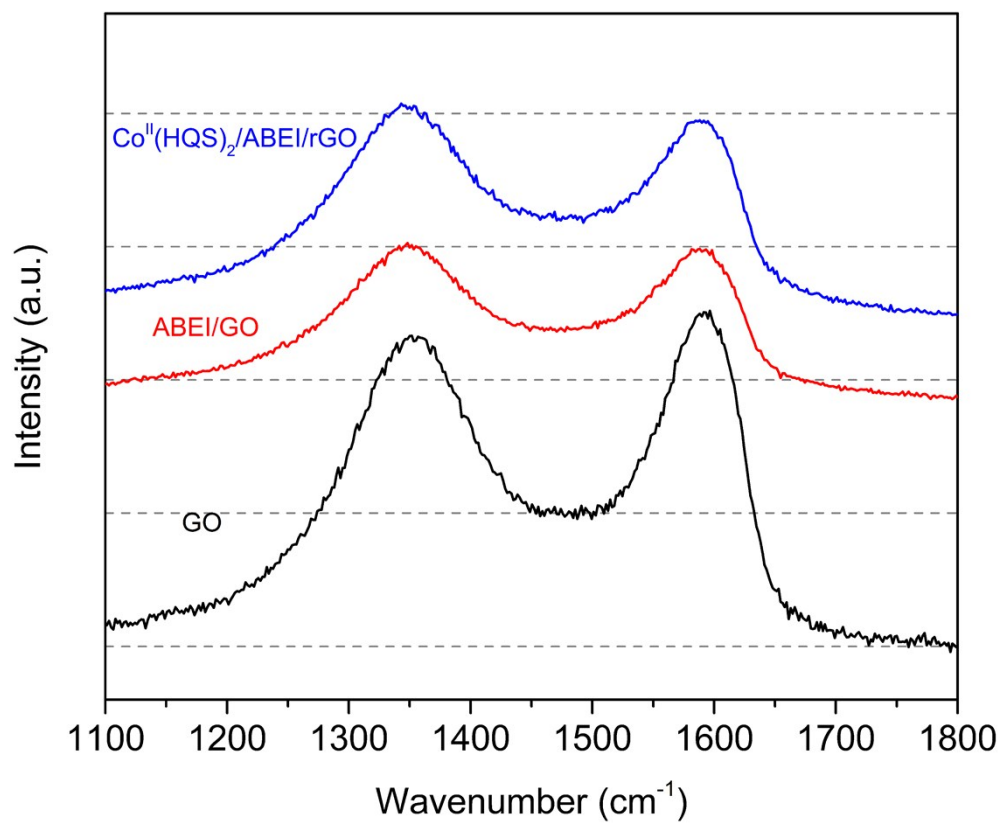

**Figure S3.** Raman spectra of GO, ABEI/GO and Co<sup>II</sup>(HQS)<sub>2</sub>/ABEI/rGO.

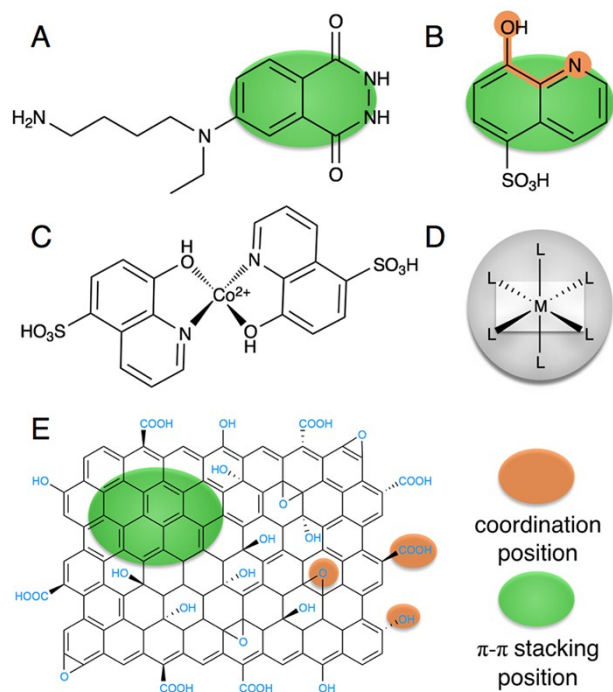

**Figure S4.** Structures of A) N-(4-aminobutyl)-N-ethylisoluminol, B) 8-hydroxyquinoline-5-sulfonic acid, C) Co<sup>II</sup>(HQS)<sub>2</sub> complex, D) octahedral coordination complex and E) graphene oxide.

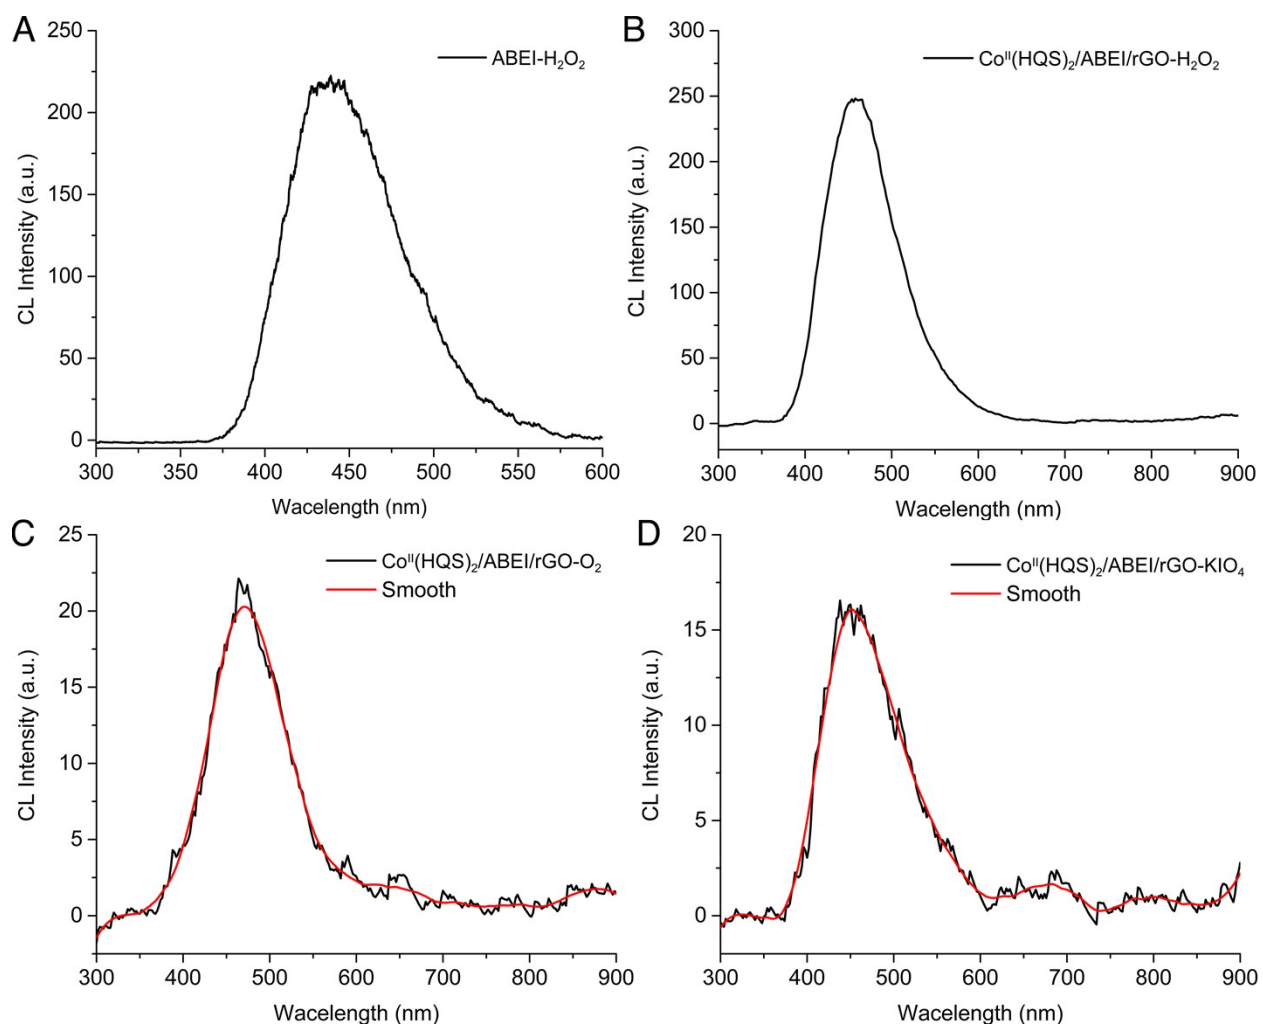

**Figure S5.** CL spectra for reaction of A) ABEI with  $H_2O_2$ , B)  $Co^{II}(HQS)_2/ABEI/rGO$  with  $H_2O_2$ , C)  $Co^{II}(HQS)_2/ABEI/rGO$  with dissolved oxygen and D)  $Co^{II}(HQS)_2/ABEI/rGO$  with  $KIO_4$  in alkaline conditions,

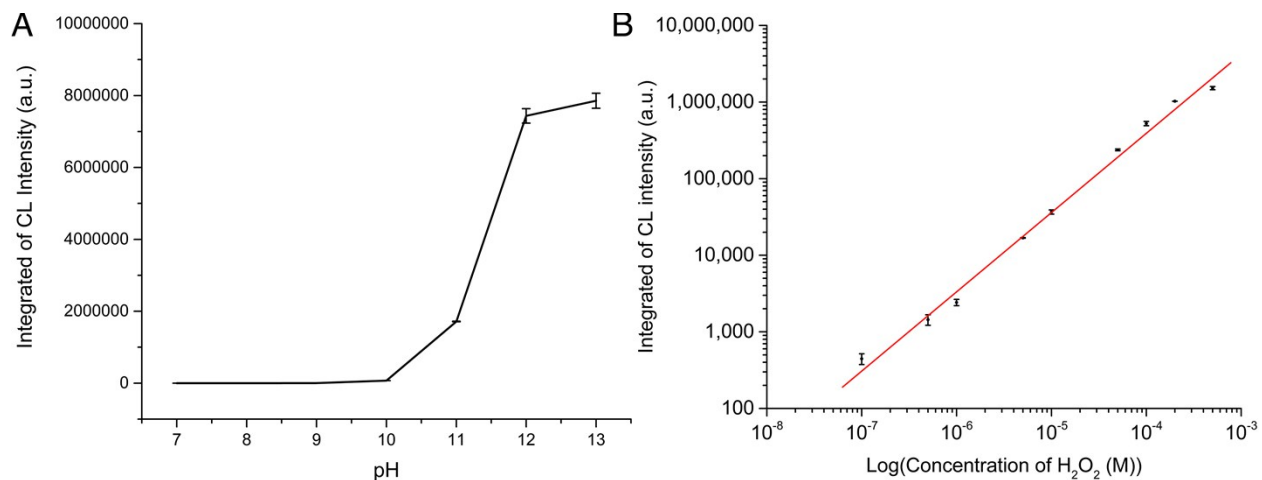

**Figure S6.** Effect of (A) pH and (B) concentration of H<sub>2</sub>O<sub>2</sub> on CL intensity of Co<sup>II</sup>(HQS)<sub>2</sub>/ABEI/rGO-H<sub>2</sub>O<sub>2</sub>. Reaction conditions: A) 0.1 mM H<sub>2</sub>O<sub>2</sub> and B) 0.01 M NaOH.

The logarithm of integrated of CL intensity increased linearly with the logarithm of the concentration of H<sub>2</sub>O<sub>2</sub> in the range of 0.1 μM to 0.5 mM. The regression equation was  $\text{Log } I = 9.74652 + 1.03437 \times \log C$  with a correlation coefficient of 0.9917, where  $I$  refers to integrated of CL intensity with 5 seconds and  $C$  the concentration of H<sub>2</sub>O<sub>2</sub>. The limit of detection (LOD) for H<sub>2</sub>O<sub>2</sub> was 0.08 μM (LOD is defined as the concentration corresponding to blank signal + 3σ, σ is the standard deviation of blank).

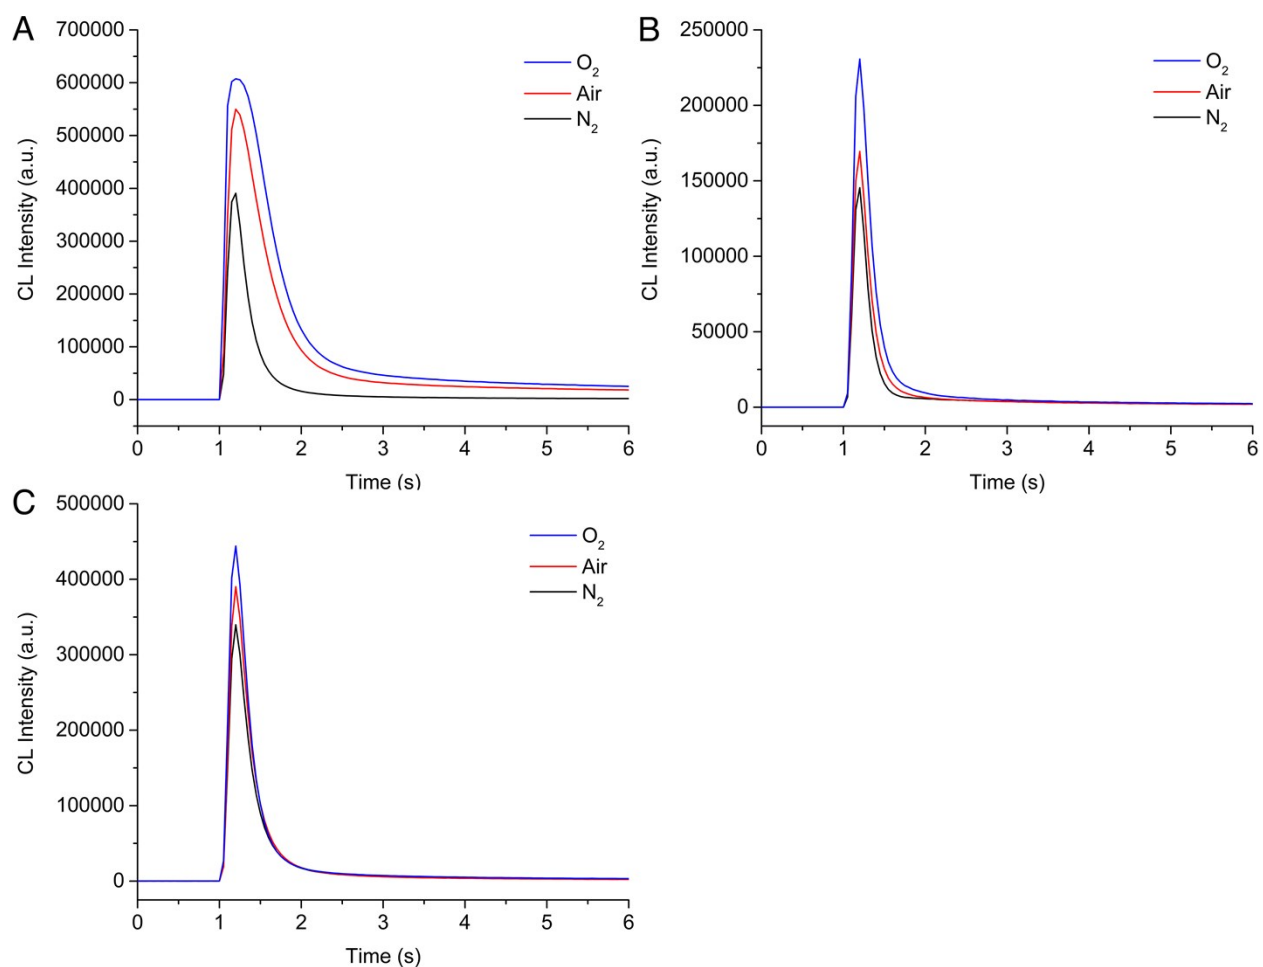

**Figure S7.** CL kinetic curves for reaction of  $\text{Co}^{\text{II}}(\text{HQS})_2/\text{ABEI}/\text{rGO}$  with A)  $\text{H}_2\text{O}_2$ , B) dissolved oxygen and C)  $\text{KIO}_4$  under oxygen-saturated (blue), air-saturated (red) and nitrogen-saturated solutions (black), respectively. Reaction conditions: A) 0.1 mM  $\text{H}_2\text{O}_2$  in 0.01 M NaOH, B) 0.1 M NaOH and C) 0.05 mM  $\text{KIO}_4$  in 0.05 NaOH.



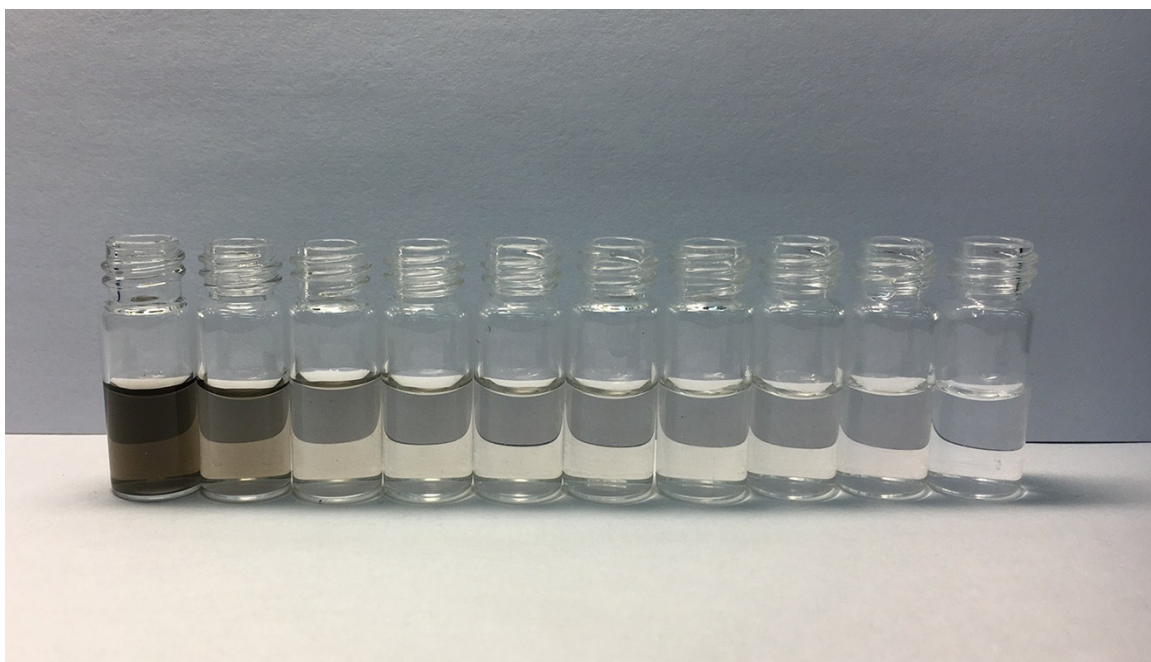

**Figure S8.** Picture of  $\text{Co}^{\text{II}}(\text{HQS})_2/\text{ABEI}/\text{rGO}$  with different dilution times (left to right: 1, 2, 4, 6, 8, 10, 15, 20, 30 and water).

## REFERENCE

1. D. Li, M. B. Mueller, S. Gilje, R. B. Kaner, G. G. Wallace,. *Nat. Nanotechnol.*, 2008, **3**, 101-105.
